# Supplementary material
Source: Springer Nature journal article supplement (https://www.springermedizin.de/resource/supplementary/12885_2008_1337_MOESM3_ESM.pdf/9472512)

**A**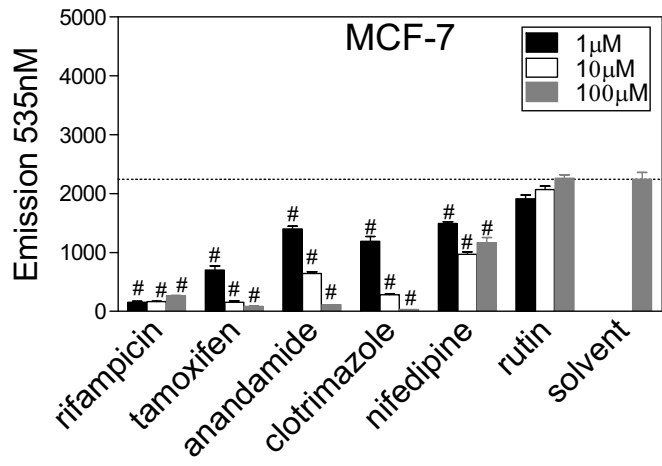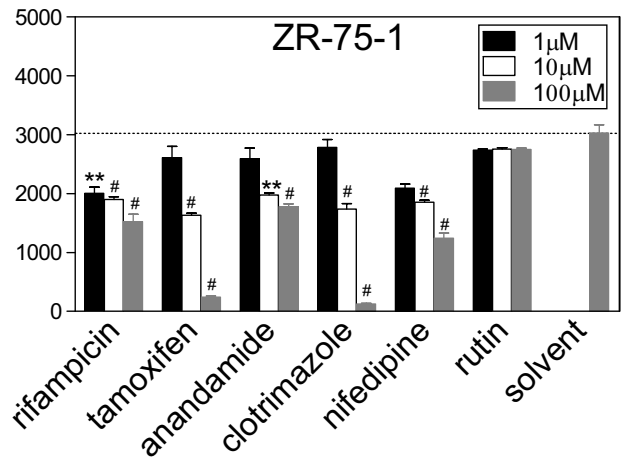**B****MCF-7**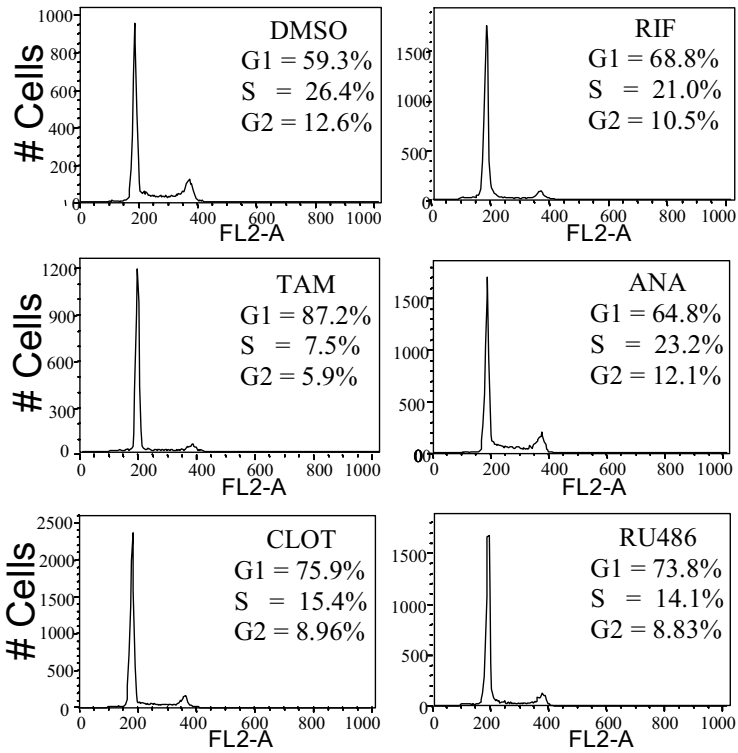**C****MCF-7**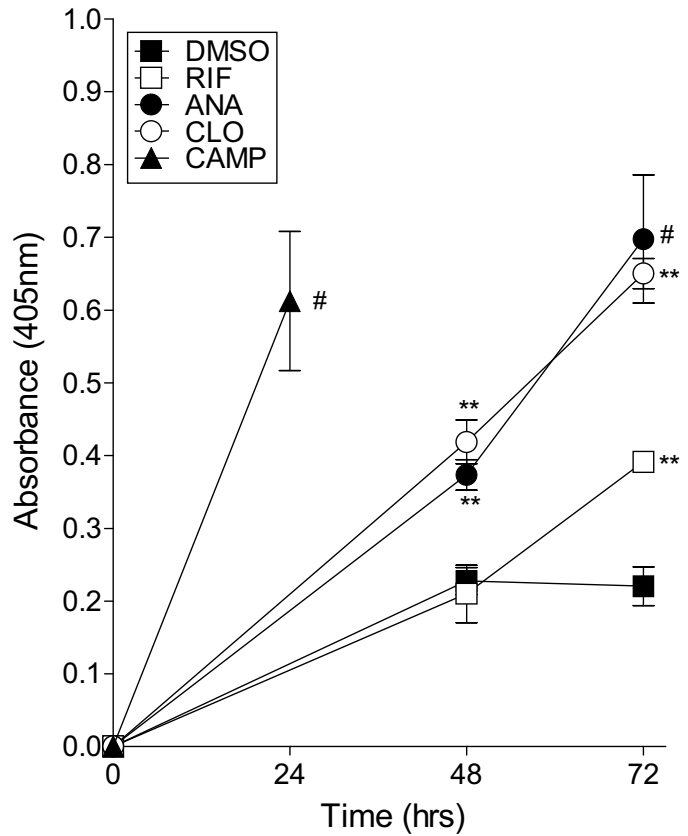

Supplement: MOESM3 [file 9472512]
